# Supplementary material for: A Human Lung-Associated Streptomyces sp. TR1341 Produces Various Secondary Metabolites Responsible for Virulence, Cytotoxicity and Modulation of Immune Response
Source: PubMed Central journal article supplement (PMC6978741; doi:10.3389/fmicb.2019.03028), 2020-01-17
Supplement: Table_2.pdf [file Table_2.pdf]

**Supplementary Table S2. *Streptomyces* strains related to *Streptomyces* sp. TR1341 and used for the construction of the 16S rRNA gene ML tree.** Non-soil origin indicated in the same color code as in Fig. 1. Pathogenic organisms shaded grey.

|    | Closest relative                                        | bp        | %    | Accession No.     | Isolation source                                                 |
|----|---------------------------------------------------------|-----------|------|-------------------|------------------------------------------------------------------|
| 1  | <i>S. ambofaciens</i> ATCC 23877                        | 1583/1630 | 97   | CP012382.1        | Soil, France: Picardie                                           |
| 2  | <i>S. atriruber</i> NRRL B-24165                        | 1587/1630 | 97   | NZ_LIPN01000196.1 | Placenta, Equine, USA                                            |
| 3  | <i>S. avermitilis</i> MA-4680 (NBRC 14893)              | 1588/1633 | 97   | BA000030.4        | Soil, Japan                                                      |
| 4  | <i>S. coelicolor</i> A3(2)                              | 1495/1537 | 97   | NC_003888.3       | Soil                                                             |
| 5  | <i>S. collinus</i> Tu 365                               | 1583/1628 | 97   | CP006259.1        | Soil                                                             |
| 6  | <i>S. costaricanus</i> NBRC 100773                      | 1480/1480 | 100  | NR_041414.1       | Nematode-suppressive soil , Costa Rica                           |
| 7  | <i>S. daghestanicus</i> NRRL B-5418                     | 1441/1484 | 97   | NR_043816.1       | Soil                                                             |
| 8  | <i>S. fuscichromogenes</i> m16                          | 1395/1421 | 98.2 | KC771428          | Soil, tropical rain forest of Xishuangbanna, China               |
| 9  | <i>S. graminearus</i> NBRC 15420                        | 1446/1448 | 100  | AB184667          | -                                                                |
| 10 | <i>S. griseochromogenes</i> ATCC 14511                  | 1587/1626 | 98   | CP016279.1        | -                                                                |
| 11 | <i>S. griseofuscus</i> KACC 20083                       | 1487/1491 | 99   | AY207605.1        | -                                                                |
| 12 | <i>S. griseofuscus</i> NBRC 12870                       | 1446/1447 | 100  | AB184206          | -                                                                |
| 13 | <i>S. griseofuscus</i> 199                              | 1535/1535 | 100  | NZ_PDES01000029.1 | Endophytic of <i>Paullinia cupana</i> (Mart) Ducke, Brazil       |
| 14 | <i>S. griseofuscus</i> NG1-7                            | 1622/1626 | 99   | NZ_MTKC01000003.1 | Rotten tree, South Korea                                         |
| 15 | <i>S. griseoviridis</i> F1-27                           | 1592/1627 | 98   | CP034687.1        | USA                                                              |
| 16 | <i>S. griseus</i> subsp. <i>griseus</i> NBRC 13350      | 1572/1631 | 96   | AP009493.1        | Soil                                                             |
| 17 | <i>S. hygrosopicus</i> subsp. <i>jinggangensis</i> TL01 | 1580/1626 | 97   | CP003720.1        | -                                                                |
| 18 | <i>S. koyangensis</i> VK-A60T                           | 1587/1626 | 98   | CP031742.1        | Soil, South Korea: Koyang                                        |
| 19 | <i>S. lanatus</i> NBRC 12787                            | 1420/1446 | 98.2 | AB184845          | Soil                                                             |
| 20 | <i>S. leeuwenhoekii</i> sleC34                          | 1595/1636 | 97   | LN831790.1        | Salar de Atacama, Atacama Desert                                 |
| 21 | <i>S. lividans</i> TK24                                 | 1494/1537 | 97   | CP009124.1        | -                                                                |
| 22 | <i>S. malaysiense</i> MUSC 136                          | 1604/1628 | 99   | NZ_LBDA02000093.1 | Mangrove, Malaysia                                               |
| 23 | <i>S. misionensis</i> DSM 40306                         | 1605/1628 | 99   | NZ_FNTD01000004.1 | -                                                                |
| 24 | <i>S. murinus</i> NBRC 12799                            | 1446/1446 | 100  | AB184155          | Soil, Germany                                                    |
| 25 | <i>S. murinus</i> NRRL B-2286                           | 1623/1628 | 99   | NZ_MUNF01000366.1 | Soil, Germany                                                    |
| 26 | <i>S. nigra</i> 452                                     | 1588/1631 | 97   | CP029043.1        | mangrove soil, China                                             |
| 27 | <i>S. nodosus</i> ATCC 14899                            | 1584/1634 | 97   | CP009313.1        | Orinoco river basin                                              |
| 28 | <i>S. padanus</i> ATCC 25646                            | 1519/1519 | 100  | AF455813.1        | -                                                                |
| 29 | <i>S. phaeogriseichromatogenes</i> NRRL 2834            | 1334/1340 | 99.6 | AJ391813          | Soil, Sri Lanka                                                  |
| 30 | <i>S. phaeoluteichromatogenes</i> NRRL 5799             | 1408/1428 | 98.6 | AJ391814          | Rothamsted experiment station                                    |
| 31 | <i>S. pseudogriseolus</i> NRRL B-3288                   | 1584/1625 | 97   | NZ_MUNG01000290.1 | Soil, Japan                                                      |
| 32 | <i>S. puniscabiei</i> TW151                             | 1586/1626 | 98   | CP017248.1        | Soil, South Korea                                                |
| 33 | <i>S. qaidamensis</i> S10                               | 1589/1640 | 97   | CP015098.1        | Soil, China                                                      |
| 34 | <i>S. silaceus</i> NRRL B-24166                         | 1586/1625 | 98   | NZ_LIRJ01000287.1 | Placenta, Equine, USA                                            |
| 35 | <i>S. sp. DconLS</i>                                    | 1625/1628 | 99   | NZ_FMDI01000408.1 | -                                                                |
| 36 | <i>S. sp. endophyte_N2</i>                              | 1627/1628 | 99   | CP028719.1        | <i>Arabidopsis thaliana</i> , United Kingdom: Norwich laboratory |
| 37 | <i>S. sp. ETH9427</i>                                   | 1590/1631 | 97   | CP029624.1        | Soil, Switzerland                                                |
| 38 | <i>S. sp. F-1</i>                                       | 1605/1628 | 99   | NZ_FKJI03000002.1 | Soil                                                             |
| 39 | <i>S. sp. Lamer LS-31b</i>                              | 1535/1535 | 100  | NZ_FMDH01000239.1 | -                                                                |
| 40 | <i>S. sp. MD1</i>                                       | 1518/1519 | 99   | HM641908.1        | Golf course soil, USA: Florida                                   |
| 41 | <i>S. sp. P127</i>                                      | 1517/1517 | 100  | EU797798.1        | Soil sample collected from farmland growing vegetables, China    |
| 42 | <i>S. sp. SAT1</i>                                      | 1580/1628 | 97   | CP015849.1        | <i>Adenophora trachelioides</i> Maxim, China                     |
| 43 | <i>S. sp. Z022</i>                                      | 1600/1629 | 98   | CP033073.1        | Grass soil, China: Dangxiong                                     |
| 44 | <i>S. violaceoruber</i> S21                             | 1571/1631 | 96   | CP020570.1        | Seabed sludge, China                                             |

|    |                                   |           |    |             |                                               |
|----|-----------------------------------|-----------|----|-------------|-----------------------------------------------|
| 45 | <i>S. acidiscabies</i> ATCC 49003 | 1485/1539 | 96 | AB026220.1  | Potato scab, USA                              |
| 46 | <i>S. scabiei</i> E-1             | 1566/1635 | 96 | AB026216.1  | -                                             |
| 47 | <i>S. scabiei</i> 87.22           | 1549/1629 | 95 | FN554889.1  | -                                             |
| 48 | <i>S. somaliensis</i> SL-3        | 1483/1521 | 98 | KF973254.1  | <i>Morus alba</i> , China                     |
| 49 | <i>S. somaliensis</i> DSM 40738   | 1445/1486 | 97 | NR_025292.1 | Mycetoma on foot of 20-year old male, Somalia |
| 50 | <i>S. sudanensis</i> SD 504       | 1469/1522 | 97 | NR_116037.1 | Mycetoma patient                              |
| 51 | <i>S. sudanensis</i> A29          | 1436/1488 | 97 | EF540897.1  | Mycetoma patient                              |
