# Supplementary material for: A Human Lung-Associated Streptomyces sp. TR1341 Produces Various Secondary Metabolites Responsible for Virulence, Cytotoxicity and Modulation of Immune Response
Source: PubMed Central journal article supplement (PMC6978741; doi:10.3389/fmicb.2019.03028), 2020-01-17
Supplement: Table_3.pdf [file Table_3.pdf]

**Supplementary Table S3. List of house-keeping genes used in the AutoMLST analysis**

| TIGRFAMs Accession No. | Name            | Mainrole category                                          | Function                                                                      |
|------------------------|-----------------|------------------------------------------------------------|-------------------------------------------------------------------------------|
| TIGR00133              | gatB            | Protein synthesis                                          | aspartyl/glutamyl-tRNA(Asn/Gln) amidotransferase, B subunit                   |
| TIGR01798              | cit_synth_I     | Energy metabolism                                          | citrate (Si)-synthase                                                         |
| TIGR00138              | rsmG_gidB       | Protein synthesis                                          | 16S rRNA (guanine(527)-N(7))-methyltransferase RsmG                           |
| TIGR01816              | sdhA_forward    | Energy metabolism                                          | succinate dehydrogenase, flavoprotein subunit                                 |
| TIGR01520              | FruBisAldo_II_A | Energy metabolism                                          | fructose-bisphosphate aldolase, class II                                      |
| TIGR00036              | dapB            | Amino acid biosynthesis                                    | 4-hydroxy-tetrahydrodipicolinate reductase                                    |
| TIGR01529              | argR_whole      | Regulatory functions                                       | arginine repressor                                                            |
| TIGR00763              | lon             | Protein fate                                               | endopeptidase La                                                              |
| TIGR02692              | tRNA_CCA_actino | Protein synthesis                                          | CCA tRNA nucleotidyltransferase                                               |
| TIGR00338              | serB            | Amino acid biosynthesis                                    | phosphoserine phosphatase SerB                                                |
| TIGR00963              | secA            | Protein fate                                               | preprotein translocase, SecA subunit                                          |
| TIGR01127              | ilvA_1Cterm     | Amino acid biosynthesis                                    | threonine ammonia-lyase                                                       |
| TIGR00459              | aspS_bact       | Protein synthesis                                          | aspartate--tRNA ligase                                                        |
| TIGR00755              | ksgA            | Protein synthesis                                          | ribosomal RNA small subunit methyltransferase A                               |
| TIGR00754              | bfr             | Transport and binding proteins                             | bacterioferritin                                                              |
| TIGR02504              | NrdJ_Z          | Purines, pyrimidines, nucleosides, and nucleotides         | ribonucleoside-diphosphate reductase, adenosylcobalamin-dependent             |
| TIGR00521              | coaBC_dfp       | Biosynthesis of cofactors, prosthetic groups, and carriers | phosphopantothencysteine decarboxylase / phosphopantothenate--cysteine ligase |
| TIGR03594              | GTPase_EngA     | Protein synthesis                                          | ribosome-associated GTPase EngA                                               |
| TIGR00088              | trmD            | Protein synthesis                                          | tRNA (guanine(37)-N(1))-methyltransferase                                     |
| TIGR00086              | smpB            | Protein synthesis                                          | SsrA-binding protein                                                          |
| TIGR00615              | recR            | DNA metabolism                                             | recombination protein RecR                                                    |
| TIGR01039              | atpD            | Energy metabolism                                          | ATP synthase F1, beta subunit                                                 |
| TIGR01134              | purF            | Purines, pyrimidines, nucleosides, and nucleotides         | amidophosphoribosyltransferase                                                |
| TIGR01137              | cysta_beta      | Amino acid biosynthesis                                    | cystathionine beta-synthase                                                   |
| TIGR00690              | rpoZ            | Transcription                                              | DNA-directed RNA polymerase, omega subunit                                    |
| TIGR01032              | rplT_bact       | Protein synthesis                                          | ribosomal protein bL20                                                        |
| TIGR00019              | prfA            | Protein synthesis                                          | peptide chain release factor 1                                                |
| TIGR01978              | sufC            | Biosynthesis of cofactors, prosthetic groups, and carriers | FeS assembly ATPase SufC                                                      |
| TIGR01225              | hutH            | Energy metabolism                                          | histidine ammonia-lyase                                                       |
| TIGR00554              | panK_bact       | Biosynthesis of cofactors, prosthetic groups, and carriers | pantothenate kinase                                                           |
| TIGR02127              | pyrF_sub2       | Purines, pyrimidines, nucleosides, and nucleotides         | orotidine 5'-phosphate decarboxylase                                          |
| TIGR01302              | IMP_dehydrog    | Purines, pyrimidines, nucleosides, and nucleotides         | inosine-5'-monophosphate dehydrogenase                                        |
| TIGR03800              | PLP_synth_Pdx2  | Biosynthesis of cofactors, prosthetic groups, and carriers | pyridoxal 5'-phosphate synthase, glutaminase subunit Pdx2                     |
| TIGR01029              | rpsG_bact       | Protein synthesis                                          | ribosomal protein uS7                                                         |
| TIGR01024              | rplS_bact       | Protein synthesis                                          | ribosomal protein bL19                                                        |

|                  |                 |                                                            |                                                                           |
|------------------|-----------------|------------------------------------------------------------|---------------------------------------------------------------------------|
| <b>TIGR00382</b> | clpX            | Protein fate                                               | ATP-dependent Clp protease, ATP-binding subunit ClpX                      |
| <b>TIGR00065</b> | ftsZ            | Cellular processes                                         | cell division protein FtsZ                                                |
| <b>TIGR00064</b> | ftsY            | Protein fate                                               | signal recognition particle-docking protein FtsY                          |
| <b>TIGR00060</b> | L18_bact        | Protein synthesis                                          | ribosomal protein uL18                                                    |
| <b>TIGR00062</b> | L27             | Protein synthesis                                          | ribosomal protein bL27                                                    |
| <b>TIGR01394</b> | TypA_BipA       | Regulatory functions                                       | GTP-binding protein TypA/BipA                                             |
| <b>TIGR00639</b> | PurN            | Purines, pyrimidines, nucleosides, and nucleotides         | phosphoribosylglycinamide formyltransferase                               |
| <b>TIGR00436</b> | era             | Protein synthesis                                          | GTP-binding protein Era                                                   |
| <b>TIGR00302</b> | TIGR00302       | Purines, pyrimidines, nucleosides, and nucleotides         | phosphoribosylformylglycinamide synthase, purS protein                    |
| <b>TIGR00431</b> | TruB            | Protein synthesis                                          | tRNA pseudouridine(55) synthase                                           |
| <b>TIGR01980</b> | sufB            | Biosynthesis of cofactors, prosthetic groups, and carriers | FeS assembly protein SufB                                                 |
| <b>TIGR00263</b> | trpB            | Amino acid biosynthesis                                    | tryptophan synthase, beta subunit                                         |
| <b>TIGR01011</b> | rpsB_bact       | Protein synthesis                                          | ribosomal protein uS2                                                     |
| <b>TIGR01855</b> | IMP_synth_hisH  | Amino acid biosynthesis                                    | imidazole glycerol phosphate synthase, glutamine amidotransferase subunit |
| <b>TIGR02067</b> | his_9_HisN      | Amino acid biosynthesis                                    | histidinol-phosphatase                                                    |
| <b>TIGR01083</b> | nth             | DNA metabolism                                             | endonuclease III                                                          |
| <b>TIGR00577</b> | fpg             | DNA metabolism                                             | DNA-formamidopyrimidine glycosylase                                       |
| <b>TIGR03705</b> | poly_P_kin      | Central intermediary metabolism                            | polyphosphate kinase 1                                                    |
| <b>TIGR01169</b> | rplA_bact       | Protein synthesis                                          | ribosomal protein uL1                                                     |
| <b>TIGR00482</b> | TIGR00482       | Biosynthesis of cofactors, prosthetic groups, and carriers | nicotinate (nicotinamide) nucleotide adenylyltransferase                  |
| <b>TIGR01994</b> | SUF_scaf_2      | Biosynthesis of cofactors, prosthetic groups, and carriers | SUF system FeS assembly protein, NifU family                              |
| <b>TIGR01009</b> | rpsC_bact       | Protein synthesis                                          | ribosomal protein uS3                                                     |
| <b>TIGR00168</b> | infC            | Protein synthesis                                          | translation initiation factor IF-3                                        |
| <b>TIGR00042</b> | TIGR00042       | DNA metabolism                                             | non-canonical purine NTP pyrophosphatase, RdgB/HAM1 family                |
| <b>TIGR02970</b> | succ_dehyd_cytB | Energy metabolism                                          | succinate dehydrogenase, cytochrome b556 subunit                          |
| <b>TIGR00048</b> | rRNA_mod_RlmN   | Protein synthesis                                          | 23S rRNA (adenine(2503)-C(2))-methyltransferase                           |
| <b>TIGR00508</b> | bioA            | Biosynthesis of cofactors, prosthetic groups, and carriers | adenosylmethionine-8-amino-7-oxononanoate transaminase                    |
| <b>TIGR02075</b> | pyrH_bact       | Purines, pyrimidines, nucleosides, and nucleotides         | UMP kinase                                                                |
| <b>TIGR00416</b> | sms             | DNA metabolism                                             | DNA repair protein RadA                                                   |
| <b>TIGR02386</b> | rpoC_TIGR       | Transcription                                              | DNA-directed RNA polymerase, beta' subunit                                |
| <b>TIGR00651</b> | pta             | Energy metabolism                                          | phosphate acetyltransferase                                               |
| <b>TIGR00713</b> | hemL            | Biosynthesis of cofactors, prosthetic groups, and carriers | glutamate-1-semialdehyde-2,1-aminomutase                                  |
| <b>TIGR01171</b> | rplB_bact       | Protein synthesis                                          | ribosomal protein uL2                                                     |
| <b>TIGR00959</b> | ffh             | Protein fate                                               | signal recognition particle protein                                       |
| <b>TIGR01455</b> | glmM            | Central intermediary metabolism                            | phosphoglucosamine mutase                                                 |
| <b>TIGR01071</b> | rplO_bact       | Protein synthesis                                          | ribosomal protein uL15                                                    |
| <b>TIGR00952</b> | S15_bact        | Protein synthesis                                          | ribosomal protein uS15                                                    |
| <b>TIGR01632</b> | L11_bact        | Protein synthesis                                          | ribosomal protein uL11                                                    |

|                  |               |                                                            |                                                              |
|------------------|---------------|------------------------------------------------------------|--------------------------------------------------------------|
| <b>TIGR00518</b> | alaDH         | Energy metabolism                                          | alanine dehydrogenase                                        |
| <b>TIGR00468</b> | pheS          | Protein synthesis                                          | phenylalanine--tRNA ligase, alpha subunit                    |
| <b>TIGR01736</b> | FGAM_synth_II | Purines, pyrimidines, nucleosides, and nucleotides         | phosphoribosylformylglycinamide synthase II                  |
| <b>TIGR01737</b> | FGAM_synth_I  | Purines, pyrimidines, nucleosides, and nucleotides         | phosphoribosylformylglycinamide synthase I                   |
| <b>TIGR00420</b> | trmU          | Protein synthesis                                          | tRNA (5-methylaminomethyl-2-thiouridylate)-methyltransferase |
| <b>TIGR01066</b> | rplM_bact     | Protein synthesis                                          | ribosomal protein uL13                                       |
| <b>TIGR01063</b> | gyrA          | DNA metabolism                                             | DNA gyrase, A subunit                                        |
| <b>TIGR02729</b> | Obg_CgtA      | Protein synthesis                                          | Obg family GTPase CgtA                                       |
| <b>TIGR00670</b> | asp_carb_tr   | Purines, pyrimidines, nucleosides, and nucleotides         | aspartate carbamoyltransferase                               |
| <b>TIGR03263</b> | guanyl_kin    | Purines, pyrimidines, nucleosides, and nucleotides         | guanylate kinase                                             |
| <b>TIGR03635</b> | uS17_bact     | Protein synthesis                                          | ribosomal protein uS17                                       |
| <b>TIGR00184</b> | purA          | Purines, pyrimidines, nucleosides, and nucleotides         | adenylosuccinate synthase                                    |
| <b>TIGR00343</b> | TIGR00343     | Biosynthesis of cofactors, prosthetic groups, and carriers | pyridoxal 5'-phosphate synthase, synthase subunit Pdx1       |
