# Supplementary material for: A Human Lung-Associated Streptomyces sp. TR1341 Produces Various Secondary Metabolites Responsible for Virulence, Cytotoxicity and Modulation of Immune Response
Source: PubMed Central journal article supplement (PMC6978741; doi:10.3389/fmicb.2019.03028), 2020-01-17
Supplement: Table_4.pdf [file Table_4.pdf]

**Supplementary Table 4.** The results of antibiotic susceptibility of *Streptomyces* sp. TR1341. Means and standard deviations are presented ( $n=3$ ). Results abbreviations – S – sensitive, R - resistant

| Antibiotic                             | Dose               | Group                                   | S. sp. TR1341  |       |          |
|----------------------------------------|--------------------|-----------------------------------------|----------------|-------|----------|
|                                        |                    |                                         | mean zone (mm) |       | result   |
| Chloramphenicol                        | 30 µg              | amphenicol                              | 20.3           | ± 2.1 | S        |
| Amikacin                               | 30 µg              | aminoglycoside                          | 40.7           | ± 1.5 | S        |
| Gentamicin                             | 10 µg              | aminoglycoside                          | 38.3           | ± 1.5 | S        |
| Streptomycin                           | 10 µg              | aminoglycoside                          | 31.3           | ± 0.6 | S        |
| <b>Penicillin</b>                      | 10UI               | penicillin                              | 12.7           | ± 0.6 | <b>R</b> |
| Amoxicillin                            | 25 µg              | aminopenicillin                         | 21.0           | ± 1.0 | S        |
| <b>Ampicillin</b>                      | 10 µg              | aminopenicillin                         | 19.0           | ± 1.0 | <b>R</b> |
| Amoxicillin + Clavulanic Acid          | 20 + 10 µg         | aminopenicillin + β-lactamase inhibitor | 30.7           | ± 0.6 | S        |
| Cefazolin                              | 30 µg              | cephalosporin (1st generation)          | 21.0           | ± 0.0 | S        |
| <b>Ceftriaxone</b>                     | 30 µg              | cephalosporin (3rd generation)          | 17.3           | ± 1.2 | <b>R</b> |
| Vancomycin                             | 30 µg              | glycopeptide                            | 25.0           | ± 0.0 | S        |
| <b>Ciprofloxacin</b>                   | 5 µg               | quinolone (1st generation)              | 16.3           | ± 1.5 | <b>R</b> |
| <b>Ofloxacin</b>                       | 5 µg               | quinolone (2nd generation)              | 14.7           | ± 1.5 | <b>R</b> |
| Erythromycin                           | 15 µg              | macrolide (1st generation)              | 41.3           | ± 1.2 | S        |
| Azithromycin                           | 15 µg              | macrolide (2nd generation)              | 40.3           | ± 0.6 | S        |
| Clarithromycin                         | 15 µg              | macrolide (2nd generation)              | 47.3           | ± 0.6 | S        |
| <b>Trimethoprim + Sulfamethoxazole</b> | 1,25 µg + 23,75 µg | pyrimidine + sulfonamide                | 0.0            | ± 0.0 | <b>R</b> |
| <b>Rifampicin</b>                      | 5 µg               | rifampicin                              | 23.3           | ± 2.1 | <b>R</b> |
| <b>Tetracycline</b>                    | 30 µg              | tetracycline (1st generation)           | 15.0           | ± 0.0 | <b>R</b> |
| Doxycycline                            | 30 µg              | tetracycline (2nd generation)           | 21.0           | ± 1.7 | S        |
| Minocycline                            | 30 µg              | tetracycline (2nd generation)           | 24.3           | ± 0.6 | S        |
